# Supplementary material for: Energetic Analysis of Low Global Warming Potential Refrigerants as Substitutes for R410A and R134a in Ground-Source Heat Pumps
Source: MDPI journal article supplement (doi:10.3390/en16093757), 2023-04-27
Supplement: s1 [file s1]

# Energetic Analysis of Low Global Warming Potential Refrigerants as Substitutes for R410A and R134a in Ground-Source Heat Pumps

Laura Fedele <sup>1,\*</sup>, Sergio Bobbo <sup>1</sup>, Davide Menegazzo <sup>1,2</sup>, Michele De Carli <sup>2</sup>, Laura Carnieletto <sup>2</sup>, Fabio Poletto <sup>3</sup>, Andrea Tarabotti <sup>3</sup>, Dimitris Mendrinou <sup>4</sup>, Giulia Mezzasalma <sup>5</sup> and Adriana Bernardi <sup>6</sup>

<sup>1</sup> Istituto per le Tecnologie della Costruzione, Consiglio Nazionale delle Ricerche, I-35127 Padua, Italy

<sup>2</sup> Dipartimento di Ingegneria Industriale, Università degli Studi di Padova, I-35131 Padua, Italy

<sup>3</sup> Hi-Ref Spa, I-35020 Tribano, Italy; andrea.tarabotti.engineering@hiref.it

<sup>4</sup> Geothermal Energy Department, Centre for Renewable Energy Sources and Saving, 19009 Pikermi, Greece; dmendrin@cres.gr

<sup>5</sup> RED srl, Via le dell'Industria 58B, I-35127 Padua, Italy; giulia.mezzasalma@red-srl.com

<sup>6</sup> Istituto di Scienze dell'Atmosfera e del Clima, Consiglio Nazionale delle Ricerche, I-35127 Padua, Italy; adriana.bernardi@isac.cnr.it

\* Correspondence: laura.fedele@itc.cnr.it

## Supporting information file

### Figures

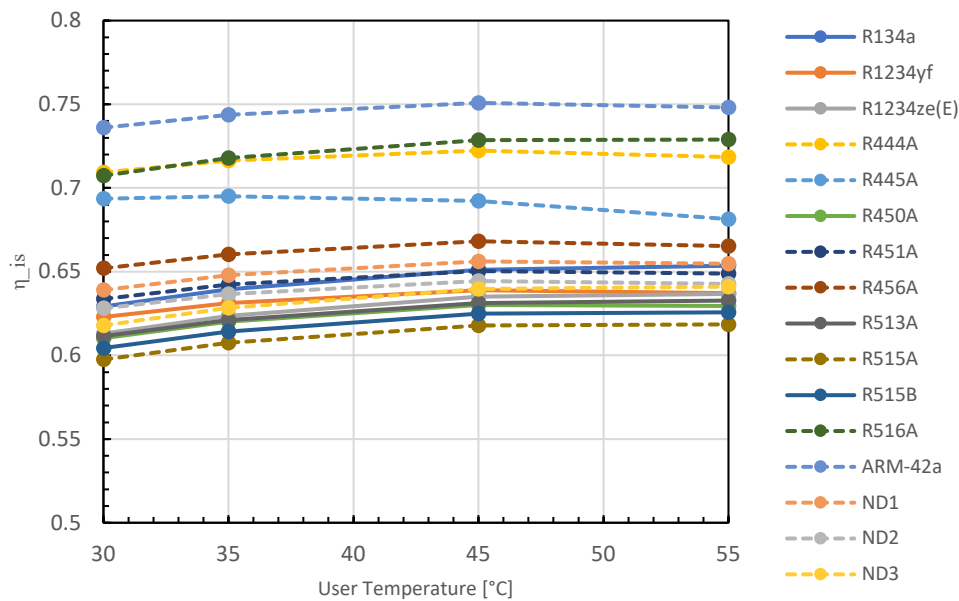

**Figure S1.** Compressor isentropic efficiency for R134a and its alternatives with the base cycle in Scenario C [User temperature: 30°C/35°C (inlet/outlet), Source temperature: -3°C/0°C].

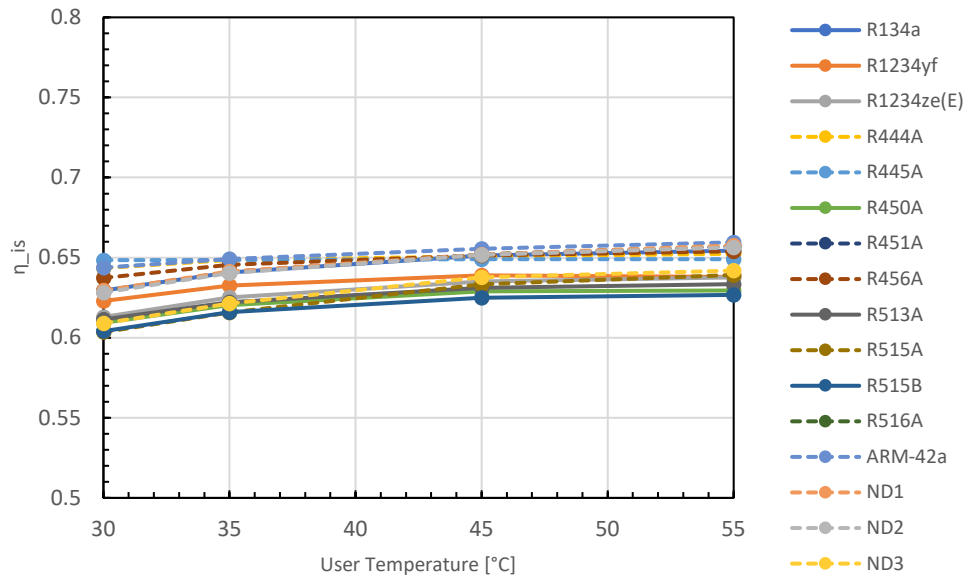

**Figure S2.** Compressor isentropic efficiency for R134a and its alternatives with the base cycle in Scenario D [User temperature: 30°C/35°C (inlet/outlet), Source temperature: -3°C/0°C].

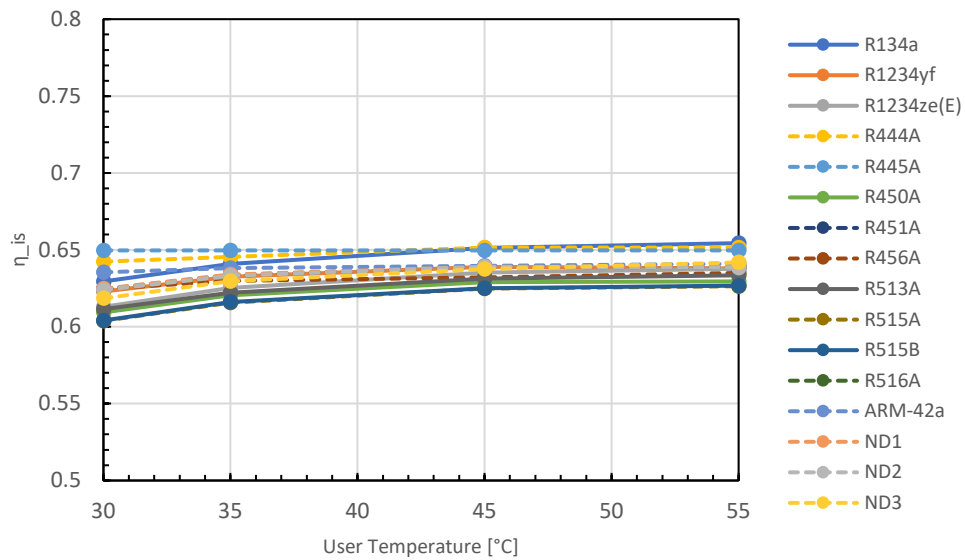

**Figure S3.** Compressor isentropic efficiency for R134a and its alternatives with the base cycle in Scenario E [User temperature: 30°C/35°C (inlet/outlet), Source temperature: -3°C/0°C].

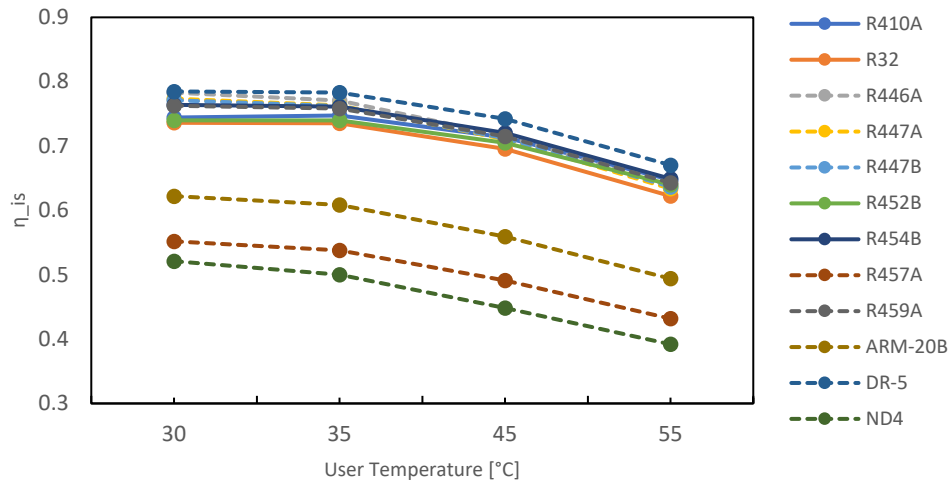

**Figure S4.** Compressor isentropic efficiency for R410A and its alternatives with the base cycle in Scenario C [User temperature: 30°C/35°C (inlet/outlet), Source temperature: -3°C/0°C].

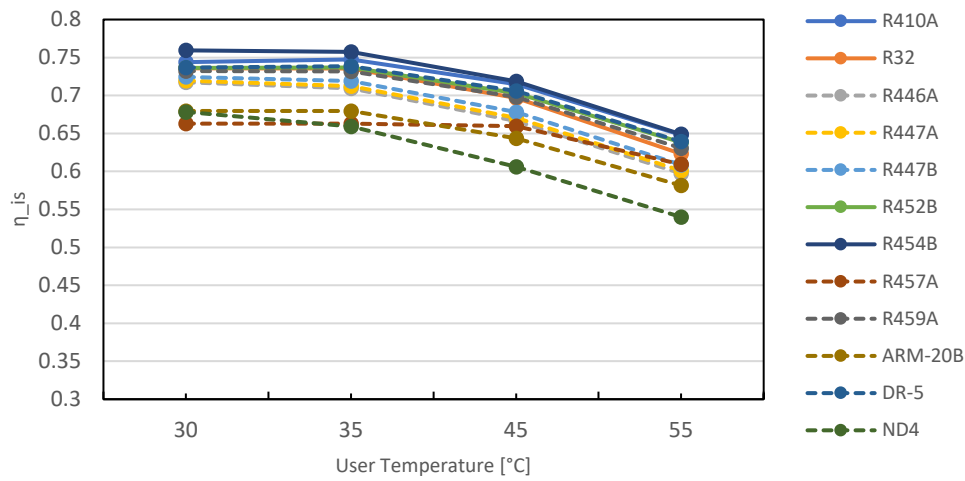

**Figure S5.** Compressor isentropic efficiency for R410A and its alternatives with the base cycle in Scenario D [User temperature: 30°C/35°C (inlet/outlet), Source temperature: -3°C/0°C].

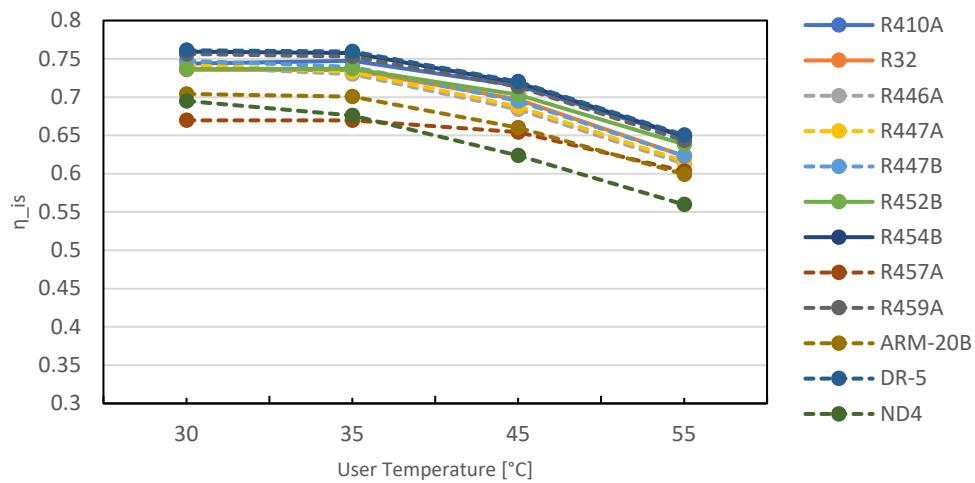

**Figure S6.** Compressor isentropic efficiency for R410A and its alternatives with the base cycle in Scenario E [User temperature: 30°C/35°C (inlet/outlet), Source temperature: -3°C/0°C].

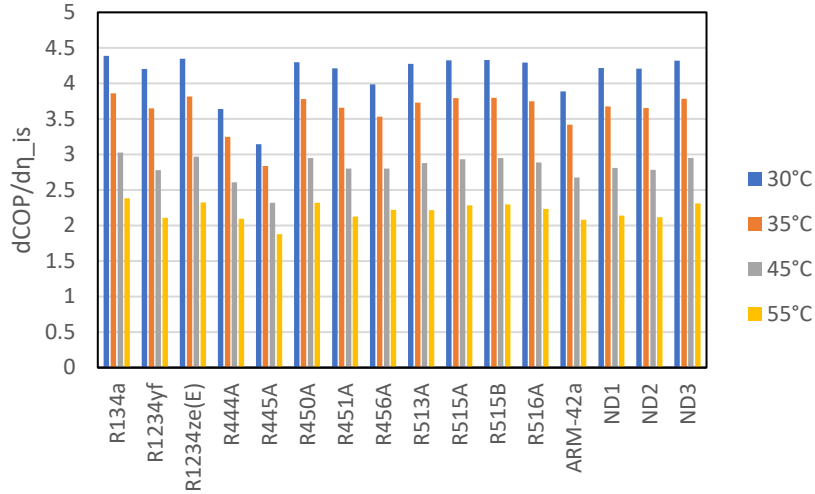

**Figure S7.** Sensitivity coefficient for R134a substitutes with base cycle. Source temperature:0/-3°C.

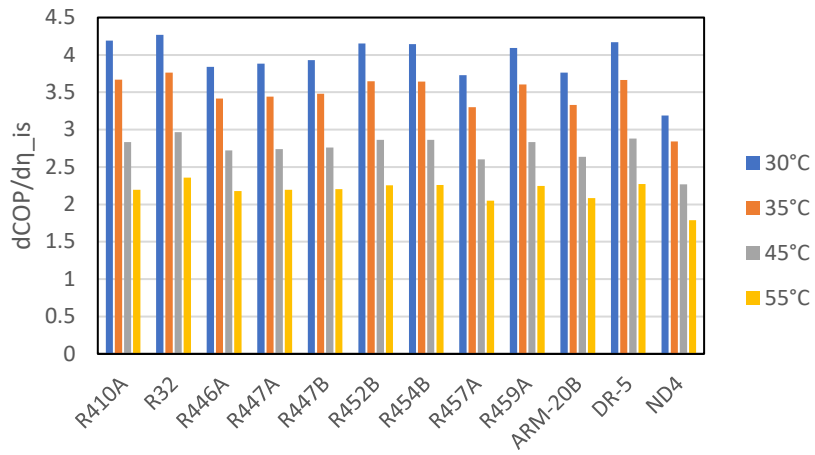

**Figure S8.** Sensitivity coefficient for R410A substitutes with base cycle. Source temperature:0/-3°C.

**Further details on Eq.23**

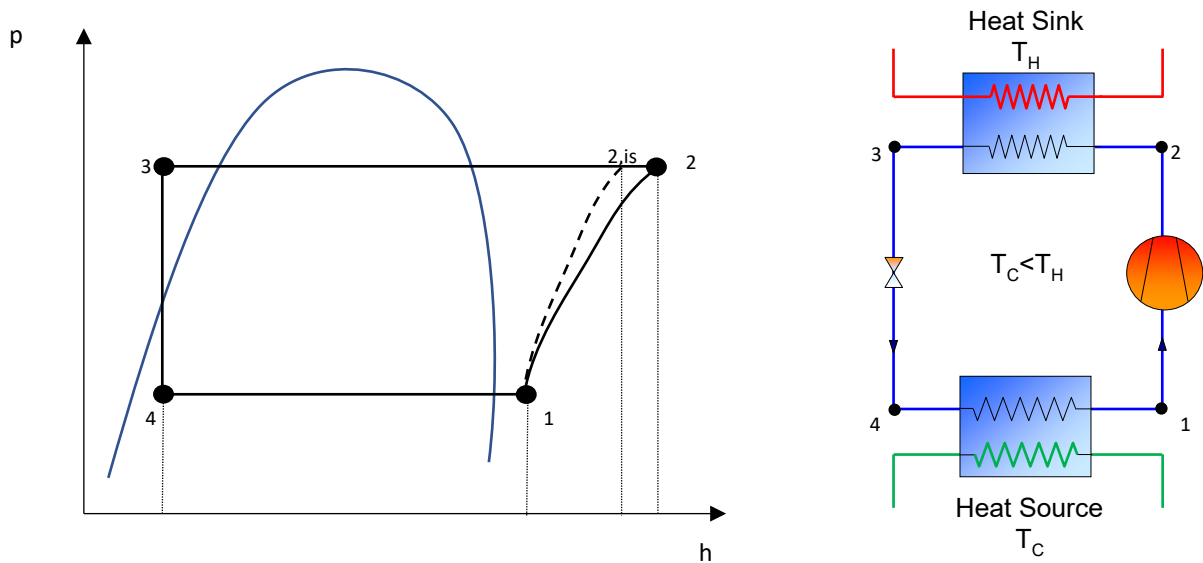

**Figure S9.** (left) example of p-h diagram referred to (right) a thermodynamic scheme of base cycle.

The following Eq. SI1-SI4 are meant to explain Eq. 23 shown in the main paper. The subscripts in Eq. SI1-SI4 are referred to Fig. SI9. The reader is pleased to refer to the main paper for the nomenclature.

$$COP = \frac{q_{cond}}{W_{compr}} = \frac{h_2 - h_3}{h_2 - h_1} = \frac{h_2 - h_3 + (h_1 - h_1)}{h_2 - h_1} = \frac{h_1 - h_3}{h_2 - h_1} + 1 \quad (SI1)$$

$$W_{compr} = h_2 - h_1 = \frac{h_2 - h_1}{\eta_{is}} \quad (SI2)$$

$$COP = \frac{h_1 - h_3}{h_{2,is} - h_1} \cdot \eta_{is} + 1 \quad (SI3)$$

$$\frac{dCOP}{d\eta_{is}} = \frac{h_1 - h_3}{h_{2,is} - h_1} = \frac{h_{ev,out} - h_{cond,out}}{h_{compr,out,is} - h_{ev,out}} \quad (SI4)$$

## Tables

**Table S1.** Relative COP results for R134a alternatives with the base cycle [User temperature: 30°C/35°C (inlet/outlet), Source temperature: -3°C/0°C].

|            | Scenario |         |        |         |         |
|------------|----------|---------|--------|---------|---------|
| Fluid      | A        | B       | C      | D       | E       |
| R1234yf    | -3.081   | -2.865  | -3.614 | -3.612  | -3.612  |
| R1234ze(E) | -0.493   | -0.215  | -2.587 | -2.536  | -2.536  |
| R444A      | -14.566  | -13.545 | -6.760 | -12.781 | -13.028 |
| R450A      | -1.484   | -1.380  | -3.755 | -3.865  | -3.865  |
| R451A      | -2.960   | -2.753  | -2.246 | -2.451  | -3.390  |
| R456A      | -7.757   | -7.213  | -5.139 | -6.707  | -8.324  |
| R513A      | -1.995   | -1.855  | -3.681 | -3.687  | -3.687  |
| R515A      | -0.615   | -0.601  | -4.888 | -3.636  | -4.126  |
| R515B      | -0.536   | -0.755  | -4.006 | -3.997  | -3.997  |
| R516A      | -1.701   | -1.582  | 7.374  | -1.309  | -2.267  |
| ARM-42a    | -9.796   | -9.110  | 1.841  | -7.792  | -9.010  |
| ND1        | -2.845   | -2.645  | -1.469 | -2.293  | -3.247  |
| ND2        | -3.048   | -2.835  | -2.980 | -2.797  | -3.759  |
| ND3        | -1.018   | -0.947  | -2.749 | -3.440  | -2.704  |

**Table S2.** Relative VHE results for R134a alternatives with the base cycle [User temperature: 30°C/35°C (inlet/outlet), Source temperature: -3°C/0°C].

|            | Scenario |         |         |         |         |
|------------|----------|---------|---------|---------|---------|
| Fluid      | A        | B       | C       | D       | E       |
| R1234yf    | -3.008   | -2.792  | -2.446  | -2.448  | -2.448  |
| R1234ze(E) | -26.416  | -26.342 | -25.732 | -25.708 | -25.708 |
| R444A      | -6.881   | -5.768  | -8.044  | -5.661  | -5.553  |
| R450A      | -14.124  | -14.033 | -13.271 | -13.238 | -13.238 |
| R451A      | -0.746   | -0.534  | -0.631  | -0.560  | -0.226  |
| R456A      | -3.964   | -3.399  | -3.952  | -3.373  | -2.745  |
| R513A      | 3.517    | 3.665   | 4.399   | 4.400   | 4.400   |

|                |         |         |         |         |         |
|----------------|---------|---------|---------|---------|---------|
| <b>R515A</b>   | -27.522 | -27.512 | -26.383 | -26.724 | -26.593 |
| <b>R515B</b>   | -27.234 | -27.265 | -26.292 | -26.295 | -26.295 |
| <b>R516A</b>   | 1.167   | 1.290   | -1.619  | 1.241   | 1.579   |
| <b>ARM-42a</b> | 11.616  | 12.466  | 8.377   | 12.189  | 12.818  |
| <b>ND1</b>     | 0.185   | 0.391   | 0.111   | 0.344   | 0.685   |
| <b>ND2</b>     | -1.855  | -1.639  | -1.504  | -1.688  | -1.401  |
| <b>ND3</b>     | -23.460 | -23.405 | -22.901 | -22.710 | -22.914 |

**Table S3.** Relative COP results for R134a alternatives with the regenerative cycle [User temperature: 30°C/35°C (inlet/outlet), Source temperature: -3°C/0°C].

| <b>Scenario</b>   |          |          |          |          |          |
|-------------------|----------|----------|----------|----------|----------|
| <b>Fluid</b>      | <b>A</b> | <b>B</b> | <b>C</b> | <b>D</b> | <b>E</b> |
| <b>R1234yf</b>    | -1.107   | -0.997   | -1.906   | -1.871   | -1.871   |
| <b>R1234ze(E)</b> | 0.310    | -1.063   | -2.118   | -2.962   | -2.962   |
| <b>R444A</b>      | -11.746  | -10.178  | -1.135   | -9.008   | -9.401   |
| <b>R450A</b>      | -1.844   | -0.846   | -2.618   | -3.147   | -3.147   |
| <b>R451A</b>      | -4.522   | -3.370   | -2.373   | -3.096   | -3.980   |
| <b>R456A</b>      | -3.967   | -2.847   | 0.187    | -2.136   | -3.984   |
| <b>R513A</b>      | -3.625   | -2.547   | -4.005   | -4.454   | -4.454   |
| <b>R515A</b>      | -2.028   | -0.994   | -4.422   | -3.883   | -3.997   |
| <b>R515B</b>      | -1.937   | -0.935   | -3.495   | -3.888   | -3.888   |
| <b>R516A</b>      | -3.108   | -2.018   | 7.796    | -1.964   | -2.665   |
| <b>ARM-42a</b>    | -6.129   | -4.885   | 7.369    | -3.948   | -5.120   |
| <b>ND1</b>        | -4.161   | -3.011   | -1.384   | -2.718   | -3.593   |
| <b>ND2</b>        | -4.608   | -3.470   | -3.114   | -3.265   | -4.110   |
| <b>ND3</b>        | -2.129   | -1.168   | -1.684   | -3.641   | -2.096   |

**Table S4.** Relative VHE results for R134a alternatives with the regenerative cycle [User temperature: 30°C/35°C (inlet/outlet), Source temperature: -3°C/0°C].

| <b>Scenario</b>   |          |          |          |          |          |
|-------------------|----------|----------|----------|----------|----------|
| <b>Fluid</b>      | <b>A</b> | <b>B</b> | <b>C</b> | <b>D</b> | <b>E</b> |
| <b>R1234yf</b>    | -1.204   | -1.094   | -0.802   | -2.448   | -0.744   |
| <b>R1234ze(E)</b> | -25.853  | -27.004  | -25.624  | -25.708  | -26.419  |
| <b>R444A</b>      | -0.009   | 1.768    | -0.430   | -5.661   | 1.925    |
| <b>R450A</b>      | -13.867  | -12.992  | -11.820  | -13.238  | -12.186  |
| <b>R451A</b>      | -2.551   | -1.375   | -0.879   | -0.560   | -0.931   |
| <b>R456A</b>      | 3.178    | 4.381    | 4.214    | -3.373   | 5.021    |
| <b>R513A</b>      | 1.670    | 2.807    | 4.151    | 4.400    | 3.693    |
| <b>R515A</b>      | -28.432  | -27.676  | -26.308  | -26.724  | -26.805  |
| <b>R515B</b>      | -28.148  | -27.413  | -26.192  | -26.295  | -26.529  |
| <b>R516A</b>      | -0.418   | 0.701    | -1.388   | 1.241    | 1.129    |
| <b>ARM-42a</b>    | 19.029   | 20.607   | 17.203   | 12.189   | 21.054   |
| <b>ND1</b>        | -1.284   | -0.100   | 0.192    | 0.344    | 0.335    |
| <b>ND2</b>        | -3.657   | -2.507   | -1.782   | -1.688   | -2.032   |

|            |         |         |         |         |         |
|------------|---------|---------|---------|---------|---------|
| <b>ND3</b> | -23.687 | -22.938 | -22.129 | -22.710 | -22.484 |
|------------|---------|---------|---------|---------|---------|

**Table S5.** Relative COP results for R410A alternatives with the base cycle [User temperature: 30°C/35°C (inlet/outlet), Source temperature: -3°C/0°C].

| <b>Scenario</b> |          |          |          |          |          |
|-----------------|----------|----------|----------|----------|----------|
| <b>Fluid</b>    | <b>A</b> | <b>B</b> | <b>C</b> | <b>D</b> | <b>E</b> |
| <b>R32</b>      | 1.539    | 1.426    | -0.188   | -0.116   | -0.116   |
| <b>R446A</b>    | -6.718   | -6.224   | -5.226   | -10.699  | -8.991   |
| <b>R447A</b>    | -6.073   | -5.626   | -5.192   | -9.861   | -8.057   |
| <b>R447B</b>    | -5.097   | -4.722   | -4.256   | -8.280   | -6.402   |
| <b>R452B</b>    | -0.788   | -0.938   | -1.902   | -2.122   | -2.122   |
| <b>R454B</b>    | -0.964   | -0.893   | 0.126    | -0.185   | -0.185   |
| <b>R457A</b>    | -8.395   | -7.777   | -28.264  | -14.225  | -13.600  |
| <b>R459A</b>    | -1.964   | -1.775   | -1.277   | -3.794   | -1.738   |
| <b>ARM-20B</b>  | -8.100   | -7.504   | -21.407  | -13.975  | -12.974  |
| <b>DR-5</b>     | -0.481   | -0.445   | 2.858    | -1.511   | 0.600    |
| <b>ND4</b>      | -19.632  | -18.028  | -38.855  | -26.220  | -25.251  |

**Table S6.** Relative VHE results for R410A alternatives with the base cycle [User temperature: 30°C/35°C (inlet/outlet), Source temperature: -3°C/0°C].

| <b>Scenario</b> |          |          |          |          |          |
|-----------------|----------|----------|----------|----------|----------|
| <b>Fluid</b>    | <b>A</b> | <b>B</b> | <b>C</b> | <b>D</b> | <b>E</b> |
| <b>R32</b>      | 9.258    | 9.136    | 9.699    | 9.674    | 9.674    |
| <b>R446A</b>    | -16.782  | -16.341  | -16.719  | -14.904  | -15.549  |
| <b>R447A</b>    | -15.271  | -14.868  | -15.005  | -13.574  | -14.176  |
| <b>R447B</b>    | -12.452  | -12.106  | -12.310  | -11.021  | -11.641  |
| <b>R452B</b>    | -4.266   | -4.230   | -3.859   | -3.721   | -3.721   |
| <b>R454B</b>    | -5.337   | -5.269   | -5.583   | -5.492   | -5.492   |
| <b>R457A</b>    | -46.602  | -46.242  | -40.549  | -44.869  | -45.021  |
| <b>R459A</b>    | -7.771   | -7.593   | -7.821   | -7.051   | -7.684   |
| <b>ARM-20B</b>  | -34.123  | -33.695  | -29.472  | -32.005  | -32.302  |
| <b>DR-5</b>     | -3.261   | -3.226   | -4.195   | -2.835   | -3.478   |
| <b>ND4</b>      | -35.458  | -34.254  | -24.012  | -31.437  | -31.780  |

**Table S7.** Relative COP results for R410A alternatives with the regenerative cycle [User temperature: 30°C/35°C (inlet/outlet), Source temperature: -3°C/0°C].

| <b>Scenario</b> |          |          |          |          |          |
|-----------------|----------|----------|----------|----------|----------|
| <b>Fluid</b>    | <b>A</b> | <b>B</b> | <b>C</b> | <b>D</b> | <b>E</b> |
| <b>R32</b>      | 0.832    | -0.222   | -2.582   | -2.029   | -2.029   |
| <b>R446A</b>    | -1.783   | -1.666   | 2.228    | -4.084   | -1.929   |
| <b>R447A</b>    | -1.030   | -0.967   | 2.090    | -3.116   | -0.928   |
| <b>R447B</b>    | 0.118    | 0.101    | 3.066    | -1.446   | 0.783    |
| <b>R452B</b>    | 1.029    | 0.948    | 0.494    | 0.226    | 0.226    |

|                |         |         |         |         |         |
|----------------|---------|---------|---------|---------|---------|
| <b>R454B</b>   | 1.176   | 1.085   | 3.000   | 2.642   | 2.642   |
| <b>R457A</b>   | -3.571  | -3.329  | -23.030 | -11.394 | -10.726 |
| <b>R459A</b>   | 1.412   | 1.295   | 2.897   | 0.417   | 2.703   |
| <b>ARM-20B</b> | -3.195  | -3.146  | -15.547 | -8.271  | -6.009  |
| <b>DR-5</b>    | 1.179   | 1.088   | 5.198   | 0.519   | 2.755   |
| <b>ND4</b>     | -16.118 | -14.993 | -34.695 | -21.091 | -19.602 |

**Table S8.** Relative VHE results for R410A alternatives with the regenerative cycle [User temperature: 30°C/35°C (inlet/outlet), Source temperature: -3°C/0°C].

| <b>Scenario</b> |          |          |          |          |          |
|-----------------|----------|----------|----------|----------|----------|
| <b>Fluid</b>    | <b>A</b> | <b>B</b> | <b>C</b> | <b>D</b> | <b>E</b> |
| <b>R32</b>      | 8.081    | 6.951    | 6.437    | 9.674    | 6.972    |
| <b>R446A</b>    | -10.757  | -10.651  | -11.669  | -14.904  | -10.613  |
| <b>R447A</b>    | -9.140   | -9.082   | -9.887   | -13.574  | -9.114   |
| <b>R447B</b>    | -6.136   | -6.152   | -6.922   | -11.021  | -6.338   |
| <b>R452B</b>    | -2.213   | -2.290   | -2.153   | -3.721   | -2.080   |
| <b>R454B</b>    | -2.934   | -3.021   | -3.515   | -5.492   | -3.425   |
| <b>R457A</b>    | -42.267  | -42.122  | -37.360  | -44.869  | -40.683  |
| <b>R459A</b>    | -3.738   | -3.850   | -4.404   | -7.051   | -4.212   |
| <b>ARM-20B</b>  | -29.105  | -28.805  | -25.660  | -32.005  | -28.228  |
| <b>DR-5</b>     | -1.430   | -1.519   | -2.581   | -2.835   | -1.958   |
| <b>ND4</b>      | -30.414  | -29.481  | -21.295  | -31.437  | -28.250  |
